# Supplementary material for: Regulation of defective mitochondrial DNA accumulation and transmission in C. elegans by the programmed cell death and aging pathways
Source: eLife. 2023 Oct 2;12:e79725. doi: 10.7554/eLife.79725 (PMC10545429; doi:10.7554/eLife.79725)
Supplement: Figure 1—figure supplement 1—source data 1. [file elife-79725-fig1-figsupp1-data1.xlsx]

## Sheet: Sheet1
	Sample	Allele	Total reads	Variant reads	% variant
	A	uaDf5	858.40*	658.48*	76.71
		w47	631	472	72.62
	B	uaDf5	451.54*	347.51*	76.96
		w47	339	248	71.06
